# Supplementary material for: Climate Change-related Crises and Public Health Outcomes in Keta Municipality, Ghana
Source: Research Square preprint supplement (doi:10.21203/rs.3.rs-8657534/v1), 2026-02-16
Supplement: Supplementary file 1 [file 7b7f3ccdf1b604b443ddde7f.docx]

**Questionnaire**

Dear Respondents,

Hello, you welcome to participate in research.

I am **David Gbedemah Fenuku,** a PhD Student at the World Bank Africa Centre of Excellence in Public Health and Toxicological Research, University of Port Harcourt, Nigeria, currently carrying out research in Keta Municipality. I will therefore like to take a few minutes of your precious time to answer these questions. You are assured that information you give will be treated confidentially and your name will not be mentioned anywhere in my research report. Thank you.

|  | **SECTION A: SOCIO- DEMOGRAPHIC DATA**   1. What is your sex? 2. Male 3. Female 4. How are old you now?   ……………………….   1. What is your Religion? 2. Christian 3. Islamic 4. Traditional 5. What is your tribe? 6. Ewe 7. Akan 8. Hausa 9. What is your level of education? 10. No formal education 11. Primary 12. Junior High School 13. Middle School 14. Senior High School 15. Tertiary 16. What is your marital status? 17. Married 18. Widow 19. Widower 20. Never married 21. Separated 22. What is your employment status? 23. Employed 24. Unemployed 25. Pensioner 26. Student 27. What is your occupation? 28. Farmer 29. Trader 30. Civil/Public Servant 31. For how long how been staying here   ……………………………………………  **SECTION B: INFORMATION ON CHANGE IN CLIMATE AND ACCESS TO DRINKING WATER SUPPLY**   1. How would you rate the availability of clean and safe water in your community?      1. Excellent 2. Very good 3. Good 4. Average 5. Poor 6. Very poor 7. Have you noticed any changes in the availability of drinking water in your community in the past few years? (e.g., scarcity, contamination). 8. Yes 9. No 10. Not sure 11. If yes, please specify the changes you have observed and their frequency).      1. Decreased water quantity 2. Increased water contamination 3. More frequency water shortages 4. Are there any health concerns in your community related to the quality of drinking water? 5. Yes 6. No 7. Not sure 8. If yes, please describe the health concerns you have noticed or experienced due to the quality of drinking water   **SECTION C: INFORMATION ON CHANGE IN CLIMATE AND HOUSEHOLD FOOD SECURITY**   1. How would you rate the overall food security in your household? 2. Excellent 3. Very good 4. Good 5. Average 6. Poor 7. Not applicable 8. Have you noticed any changes in your household food security in the past few years (e.g., food shortages, increased prices)? 9. Yes 10. No 11. Not sure 12. If yes, please specify the changes you have noticed and their frequency 13. Decreased food availability 14. Increased food prices 15. More frequent food shortages 16. Have you had to change your dietary habits due to climate-related factors? (e.g., reduced meat consumption, reliance on alternative food sources). 17. Yes 18. No 19. Not sure 20. If yes, please explain the dietary changes you have made and their reasons.   **SECTION D: INFORMATION ON PREVALENCE OF CLIMATE-CHANGE ASSOCIATED DISEASES**   1. Are you aware of any climate change-associated diseases in your community? 2. Yes 3. No 4. Not sure 5. Never heard 6. If yes, please mention the climate change-associated diseases you are aware of. 7. Have you or anyone in your family experienced any climate change-associated diseases in the past few years? 8. Yes 9. No 10. Not sure 11. Never 12. If yes, please describe the diseases and their impact on health   **SECTION E: INFORMATION ON COPING MECHANISMS OF RESIDENTS TO THE CLIMATE-CHANGE ASSOCIATED PUBLIC HEALTH PROBLEMS**   1. Are there any measures taken by government, community or local authorities to address climate change-related health issues? 2. Yes 3. No 4. Not sure 5. Never      1. If yes, please describe the measures or initiatives taken 2. Have you personally taken any steps to cope with climate change-related health problems? 3. Yes 4. No 5. Not applicable 6. Never 7. If yes, please specify the actions you have taken or measures you have implemented 8. Are you aware of any resources or support available to address climate-change related health problems in the community? 9. Yes 10. No 11. Not sure 12. Never heard 13. If yes, please provide information about the resources or support available   **Appendix B: Key Infant Interview Guide**  **Access to Water Supply**   1. In your opinion, what are the main ways in which climate change affects access to water supply? 2. Can you provide specific examples or incidents where you have observed the effects of climate change on water supply? 3. How does a change in climate, such as tidal waves impact the quantity and quality of available water sources? 4. Are there any particular communities that you have observed to be more vulnerable to climate change-related water supply issues? If so, what are the factors that contribute their vulnerability? 5. What are the primary health risks associated with inadequate access to clean water caused by climate change? 6. How do these health risks vary across different population groups, such as children, the elderly, or individuals with pre-existing health conditions? 7. In your experience, what are the long-term health consequences faced by communities when their access to clean water is compromised due to climate change? 8. In your opinion, what role can individuals, communities, governments, and organizations play in addressing the impact of climate change on water supply?   **Household Food Security**   1. In your opinion, how does climate change affect household food security in your community? 2. Can share specific examples or incidents where you have observed the effects of climate change on household food security in your community? 3. How do changing climate patterns, such as extreme weather or tidal waves, impact agricultural productivity and crop yields in your community? 4. What are the primary ways in which climate change-related disruptions in agriculture and food production contribute to food shortages and limited access to nutritious food? 5. In your opinion, what roles can individuals, communities, and government play in addressing the impact of climate change on household food security? 6. Based on your expertise, what steps should be taken to raise awareness and prioritize action on the link between climate change, household food security and public health? 7. Is there anything you would to share regarding the effects of climate change on household food security and public health?   **Prevalence of climate change-associated diseases**   1. In your view, what are the main ways in which climate change influences the prevalence of climate change-associated diseases? 2. Can you provide specific examples or incidents where you have observed the effects of climate change on the prevalence of climate change-associated diseases in your community? 3. In your experience, what are the long-term health consequences faced by communities when climate change leads to increased prevalence of climate change-associated diseases? 4. What are the primary health risks associated with climate change-associated diseases? 5. Ho do these health risks vary across different population groups, such as children, the elderly, or individuals with pre-existing health conditions 6. What kind of support or resources do you believe are necessary to address the challenges posed by climate change-related associated diseases and their impact on public health? 7. In your view, what roles can individuals, communities, governments, and organizations play in addressing the impact of climate change on the prevalence of climate change-associated diseases and public? 8. Based on your expertise, what steps should be taken to raise awareness and prioritize action on the link between climate change-associated diseases and public health?   **Coping mechanisms to climate change-associated public health problems**   1. In your opinion, what are some of the coping mechanisms or strategies that individuals, communities or government adopt to address climate change-associated public health problems? 2. How communities and individuals prepare for and respond to climate change-related public health crises, such as tidal wave or natural disasters? 3. Are there any notable examples of community-driven initiatives or grassroots movements that have effectively tackled climate change-associated problems? 4. What role do local governments or policy makers play in supporting and implementing coping mechanisms for climate change-associated public health problems? 5. Is there anything else you would like to share regarding coping mechanisms for climate change-associated public health problems?   **Appendix C: Focus Group Discussion Guide**   1. Share any experience or observations you have related to the effects of climate change on access to water supply and public health? 2. Awareness and Perceptions: 3. How aware are you of the impact of climate change on access to water supply? 4. What are your perceptions regarding the severity and urgency of the issue? 5. Climate Change and Water Supply: 6. In your view, how does climate change affect access to water supply in your community? 7. Can you provide specific examples or incidents where you have observed the effects of climate change on water supply and its consequences for public health? 8. Water Quality and Quantity: 9. How does a changing climate, such as tidal wave affects the quality and quantity of available water sources? 10. Have you noticed any changes in the availability or quality of water in your area? If so, how has this impacted public health? 11. Vulnerable Communities: 12. Are there any particular community that is more vulnerable to the effects of climate change on water supply? What factors contribute to their vulnerability? 13. How do you think these vulnerable communities are impacted in terms of public health? 14. Health Risks and Impacts: 15. What are the primary health risks associated with inadequate access to clean water caused by climate change? 16. How do these health risks affect different population groups, such children, the elderly, or individuals with pre-existing health conditions? 17. Raising Awareness and Action: 18. How can we raise awareness and prioritize action on the link between climate changes, water supply, and public health in our community? 19. What steps can be taken to engage and involve different stakeholders in addressing these issues?   **Household Food Security**   1. Share any experience or observations you have related to the effects of climate change on household food security and nutritional status? 2. Awareness and Perceptions: 3. How aware are you of the impact of climate change on household food security and nutritional status? 4. What are your perceptions regarding the severity and urgency of the issue? 5. Climate Change and Agriculture: 6. In your view, how does climate change affect agriculture and food production in your community? 7. Can you provide specific examples or incidents where you have observed the effects of climate change on household food security and its consequences on nutrition? 8. How you noticed any changes in the availability or quality of food in your area due to climate change? If so, how has this impacted house food security and nutritional status? 9. Health Risks and Impact 10. What are the primary health risks associated with household food insecurity caused by climate change? 11. How do these health risks affect population groups, such as children, pregnant women, or individuals with pre-existing health condition | []  []    []  []  []  []  []  []  []  []  []  []  []  []  []  []  []  []  []  []  []  []  []  []  []  []  []  []  []  []  []  []  []  []  []  []  []  []  []  []  []  []  []  []  []  []  []  []  []  []  []  []  []  []  []  []  []  []  []  []  []  []  []  []  []  []  []  []  []  []  []  []  []  []  []  [] |
| --- | --- | --- |
